# Supplementary material
Source: PubMed Central journal article supplement (PMC4694002)
Supplement: IAI.01138-15_zii999091533so1.pdf [file IAI.01138-15_zii999091533so1.pdf]

## Supplemental Table

Table S1. List of Primers and sequences used in PCR and RT-PCR

| Primers                                               | Sequences (5'→3')                                                           |
|-------------------------------------------------------|-----------------------------------------------------------------------------|
| <b>Primers used for mutagenesis</b>                   |                                                                             |
| Forward Primer (F $\Delta yadC$ )                     | AATGATTTATCCGTATCGCACCCCGTTGTCTGGCGGTGCG<br>ATAGTGTTA GTGTAGGCTGGAGCTGCTTC  |
| Reverse Primer (R $\Delta yadC$ )                     | ACAGACAAAGTGCTACAAGTATTATCTTGCAGCATGACAA<br>TGGAGTAAAA CATATGAATATCCTCCTTAG |
| <b>Primers used for mutant confirmation</b>           |                                                                             |
| <b>Internal primer</b>                                |                                                                             |
| Forward primer (F <i>yadC</i> -1)                     | TCAGGGGTAGGTAACCTGAA                                                        |
| Reverse primer (R <i>yadC</i> -2)                     | ATGAAGACATTCTTCAGATA                                                        |
| <b>Primers used for mutant confirmation</b>           |                                                                             |
| <b>External primer</b>                                |                                                                             |
| Forward primer (F <i>yadC</i> -3)                     | CTGGCGGTGCGATAGTGTTA                                                        |
| Reverse primer (R <i>yadC</i> -4)                     | AGCATGACAATGGAGTAAAA                                                        |
| <b>Primers used for genetic complementation</b>       |                                                                             |
| Forward Primer (F <i>C.<math>\Delta yadC</math></i> ) | TATT <i>aagctt</i> TCAGGGGTAGGTAACCTGAA                                     |
| Reverse Primer (R <i>C.<math>\Delta yadC</math></i> ) | TATT <i>cacgttg</i> ATGAAGACATTCTTCAGATA                                    |
| <b>Primers used in RT-PCR</b>                         |                                                                             |
| Forward Primer <i>yadC</i>                            | GTCTGATGGACCAACACCGTAA                                                      |
| Reverse Primer <i>yadC</i>                            | GCCGGCACCGATGATG                                                            |
| Forward Primer <i>rpoA</i>                            | GCGCTCATCTTCTTCCGA                                                          |
| Reverse Primer <i>rpoA</i>                            | CGCGGTCGTGGTTATGTG                                                          |
| Forward Primer <i>fliC</i>                            | GCCGTTGAACTGGGTCTGA                                                         |
| Reverse Primer <i>fliC</i>                            | CAAATCCCCTCTCGACGAA                                                         |
| Forward Primer <i>flhD</i>                            | TCTTGCGCAGCGCTTCT                                                           |
| Reverse Primer <i>flhD</i>                            | GCTCTCAACTCGCTTGCTGAA                                                       |
| Forward Primer <i>ompR</i>                            | GCGTTCCATTGCGGAATATT                                                        |
| Reverse Primer <i>ompR</i>                            | CCCGCGATAAGCTGATGAA                                                         |
| Forward Primer <i>flgE</i>                            | CCTCAACTCCATGCAGCAAA                                                        |
| Reverse Primer <i>flgE</i>                            | TTCTGGGTGGTTGCCACAA                                                         |
| Forward Primer <i>csgA</i>                            | TGGTAATGGTGCAGATGTTGG                                                       |
| Reverse Primer <i>csgA</i>                            | ACGTTGGGTCAGATCGATTGA                                                       |
| Forward Primer <i>ecpA</i>                            | TCATCACGGTATCGCCAGTTT                                                       |
| Reverse Primer <i>ecpA</i>                            | CTGAATGTGGCGTGGATTAT                                                        |

***Bold italic letters*** indicate Restriction enzymes sites in the complement primer

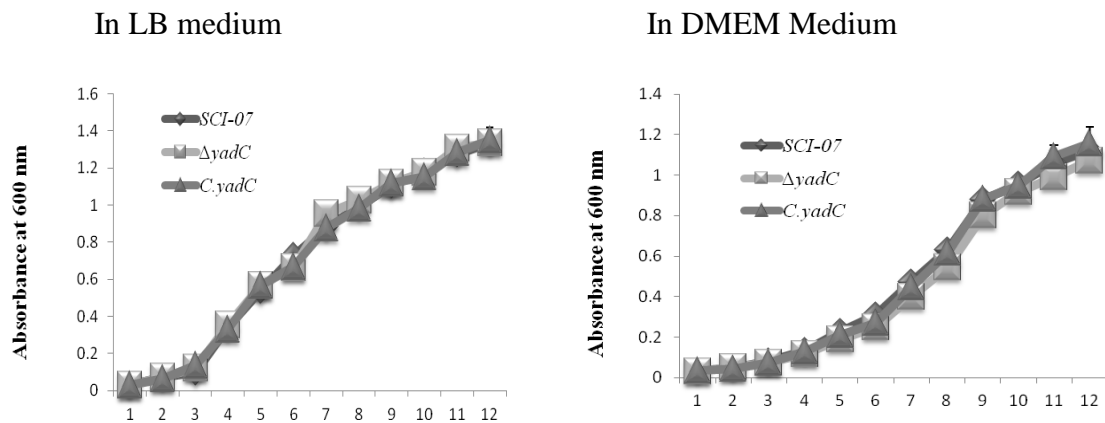

**Figure S1.** Bacterial growth curve of Wild type SCI-07,  $\Delta yadC$  and *C.yadC* strain in LB and DMEM medium.

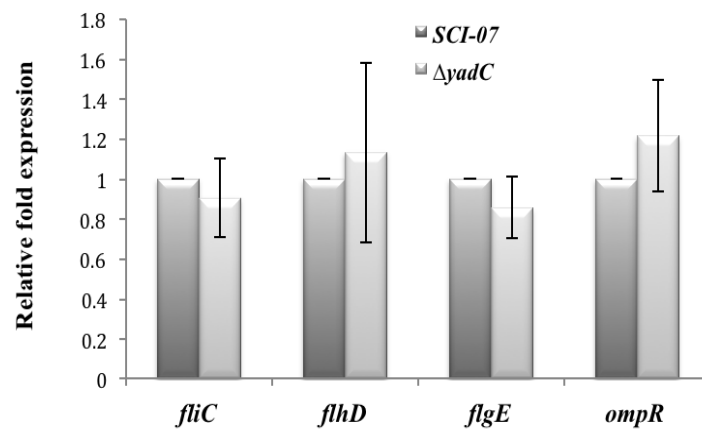

**Figure S2.** Relative fold expressions of structural flagellar (*fliC*, *flhD*, *flgE*) and flagellar regulatory (*ompR*) genes as determined by qRT-PCR in wild type (SCI-07) and mutant ( $\Delta yadC$ ) strains.
